# Supplementary material for: Camouflaged Nanorobots Target and Drive the Subcellular Organelle Crosstalk Pattern of Innate Immune Cells to Promote Neural Regeneration
Source: Research Square preprint supplement (doi:10.21203/rs.3.rs-7023010/v1), 2025-07-22
Supplement: Supplementary file 1 [file e4ffdb00e0dbafb6b14a225f.docx]

Supplementary Materials for

**Camouflaged Nanorobots Target and Drive the Subcellular Organelle Crosstalk Pattern of Innate Immune Cells to Promote Neural Regeneration**

Qiangqiang Guo *et al.*

Corresponding authors. Email: Yong Gu, guyongsuzhou@163.com; Xuesong Zhu, [zhuxs@suda.edu.cn;](mailto:zhuxs@suda.edu.cn;) Liang Chen, chenliang1972@sina.com; Kun Xi, sudaxk@163.com

**This PDF file includes:**

Figs. S1 to S18

Table S1


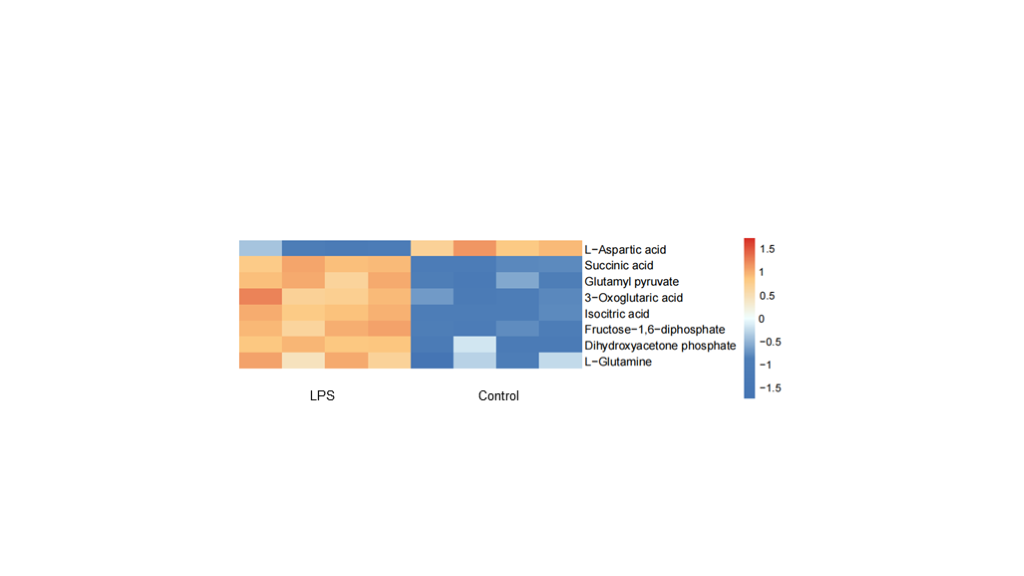


**Supplementary Figure 1. Heat map of differential metabolites in macrophages (n=4).**


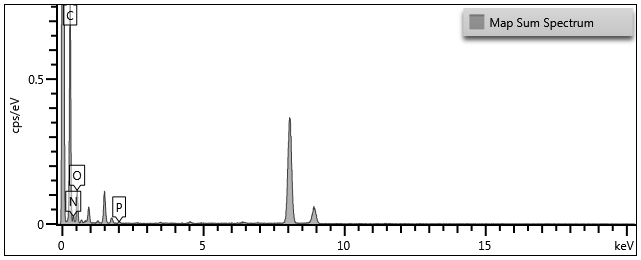


**Supplementary Figure 2. The EDS of BP@D.**


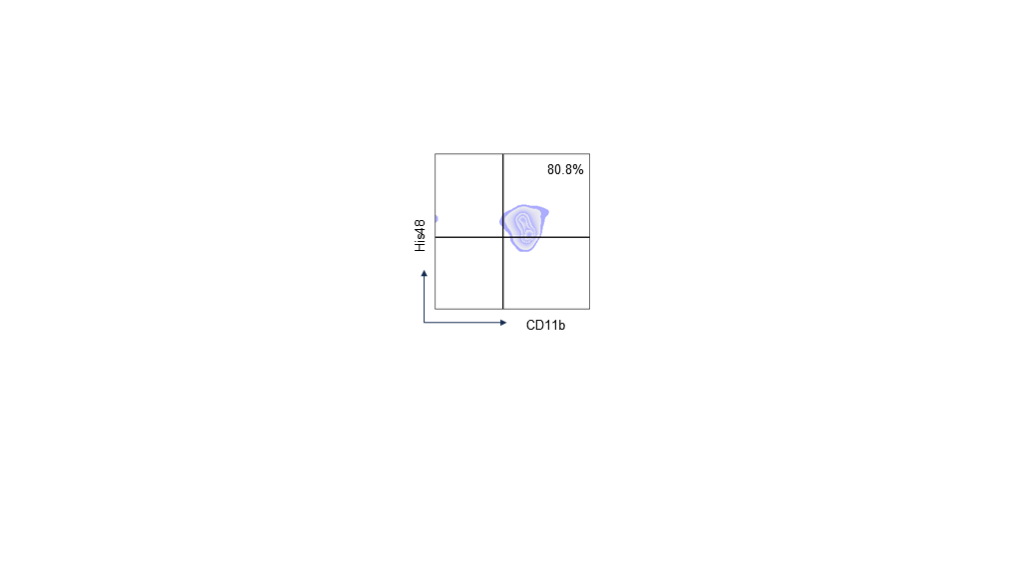


**Supplementary Figure 3. Dual-color flow cytometry for neutrophil identification.**


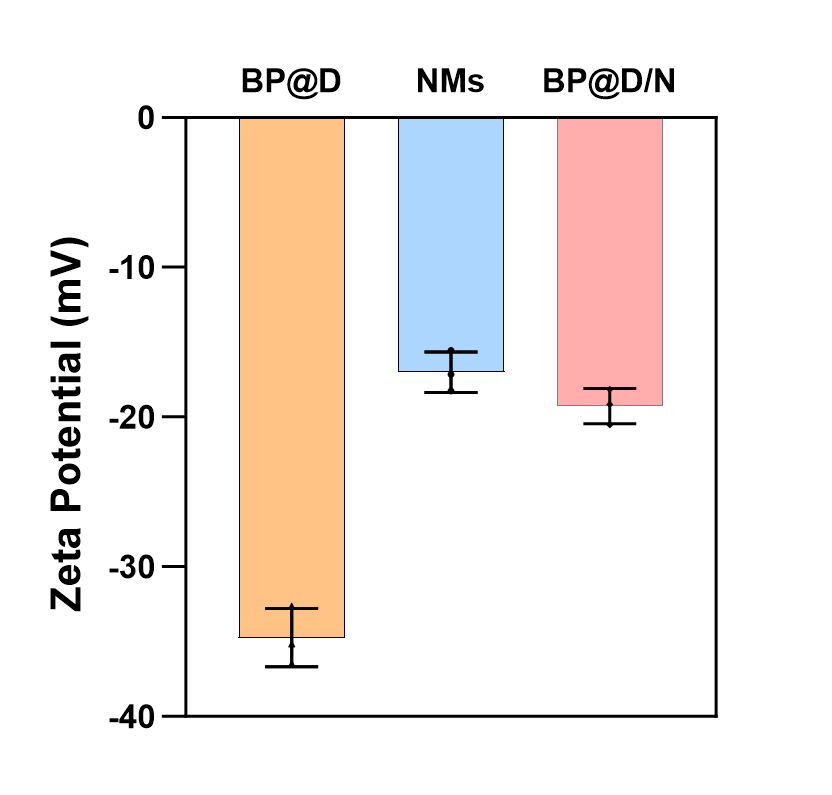


**Supplementary Figure 4. The zeta potential of BP@D, NMs, and BP@D/N (n=3).**


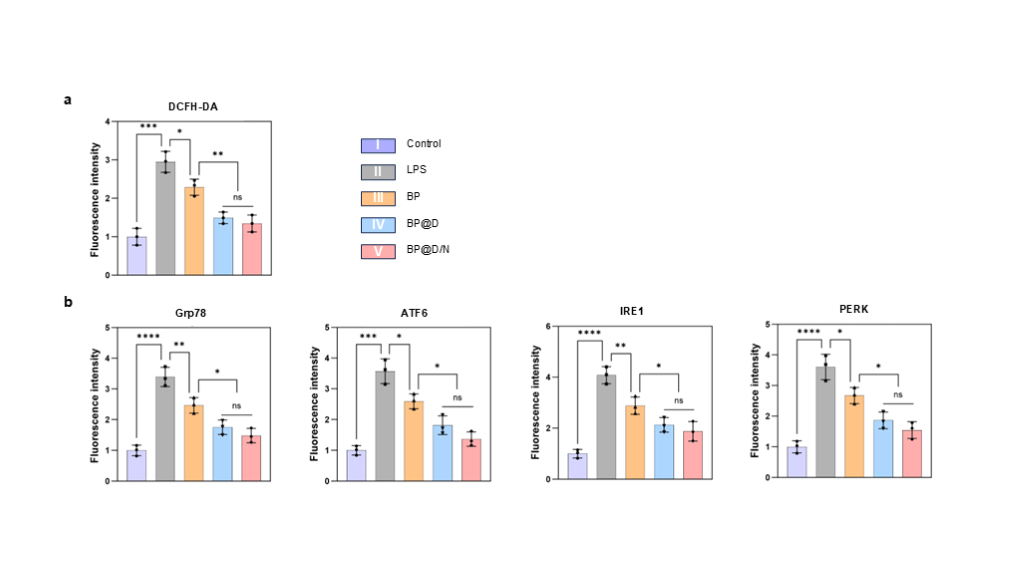


**Supplementary Figure 5. Camouflaged nanorobots alleviate Oxidative stress and ERS in Mφ. a** Semi-quantitative immunofluorescence of DCFH-DA. **b** Semi-quantitative immunofluorescence of GRP78, ATF6, IRE1, PERK. (n=3, error bars, means±SD; analysis was done using one-way ANOVA with Tukey’s post-hoc test. *P < 0.05, **P < 0.01, and ***P < 0.001.)


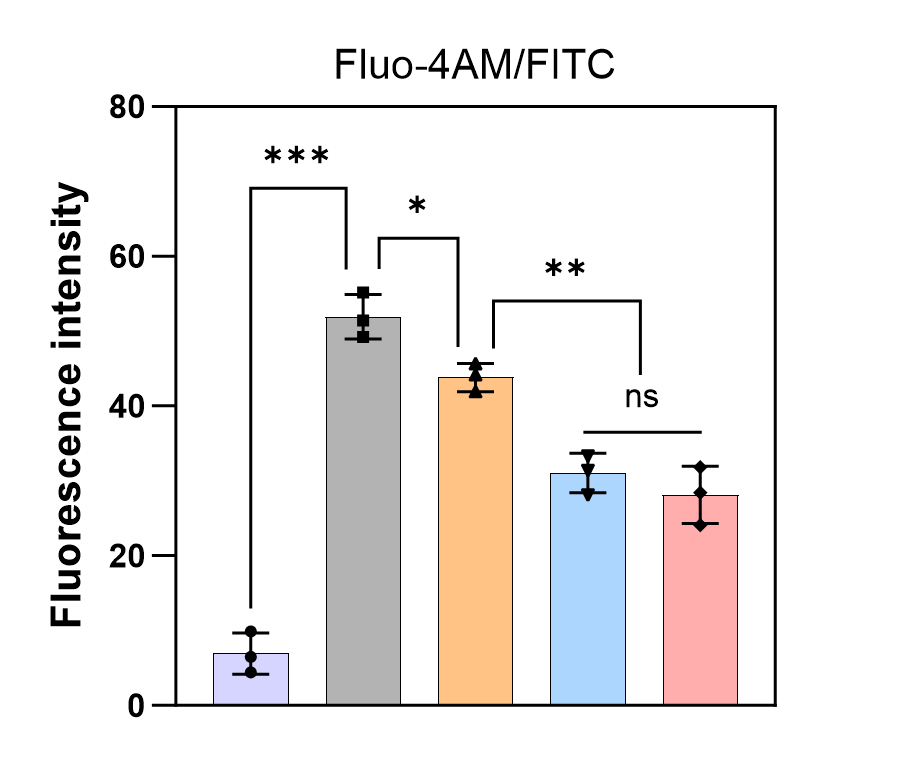


**Supplementary Figure 6. Detection of Ca2+ in the cytoplasm in Mφ.** Quantitative analysis of Ca2+ in Mφ cytoplasm by flow cytometry. (n=3, error bars, means±SD; analysis was done using one-way ANOVA with Tukey’s post-hoc test. *P < 0.05, **P < 0.01, and ***P < 0.001.)


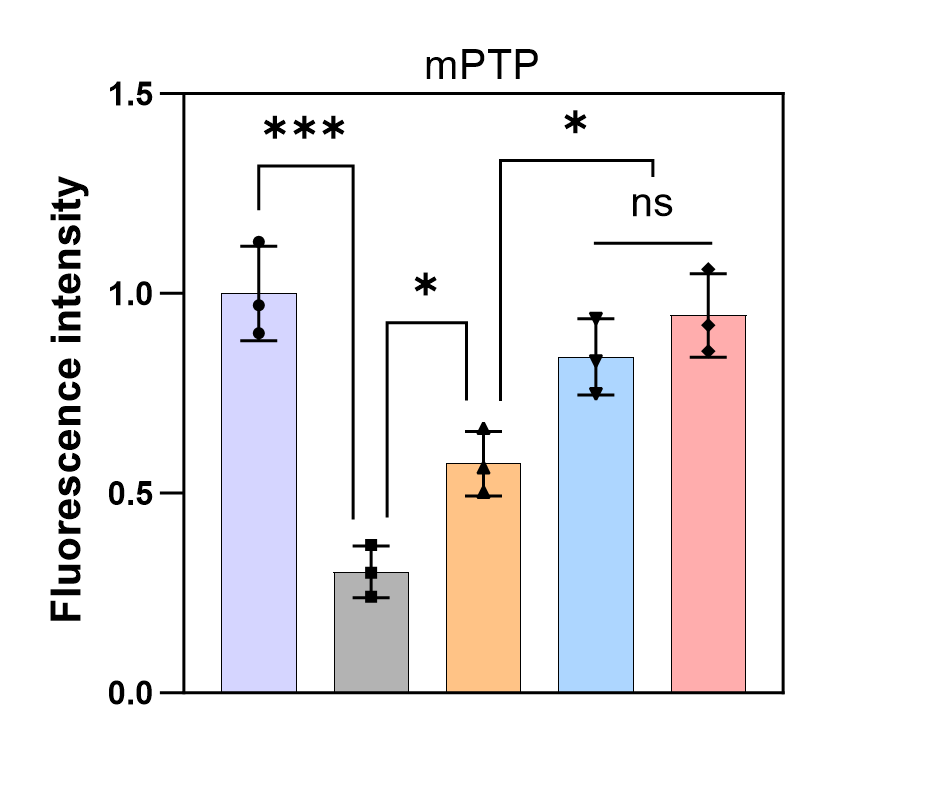


**Supplementary Figure 7. Detection of openness of mPTP.** Immunofluorescence semi-quantification of Mφ mitochondrial permeability transition pore (mPTPT). (n=3, error bars, means±SD; analysis was done using one-way ANOVA with Tukey’s post-hoc test. *P < 0.05, **P < 0.01, and ***P < 0.001.)


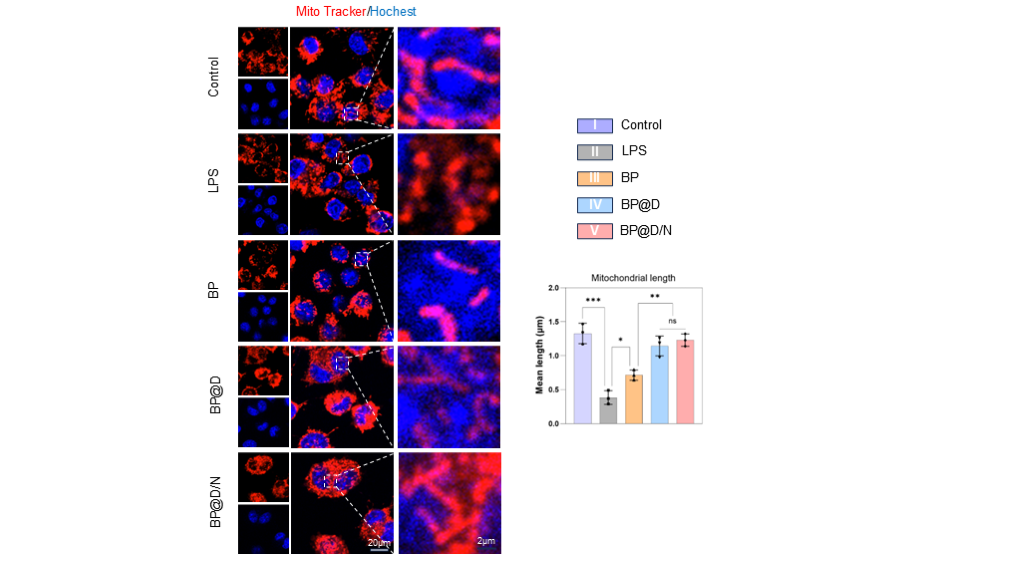


**Supplementary Figure 8. Mitochondrial morphology in Mφ.** Immunofluorescence and semi-quantification of Mφ mitochondria. (n=3, error bars, means±SD; analysis was done using one-way ANOVA with Tukey’s post-hoc test. *P < 0.05, **P < 0.01, and ***P < 0.001.)


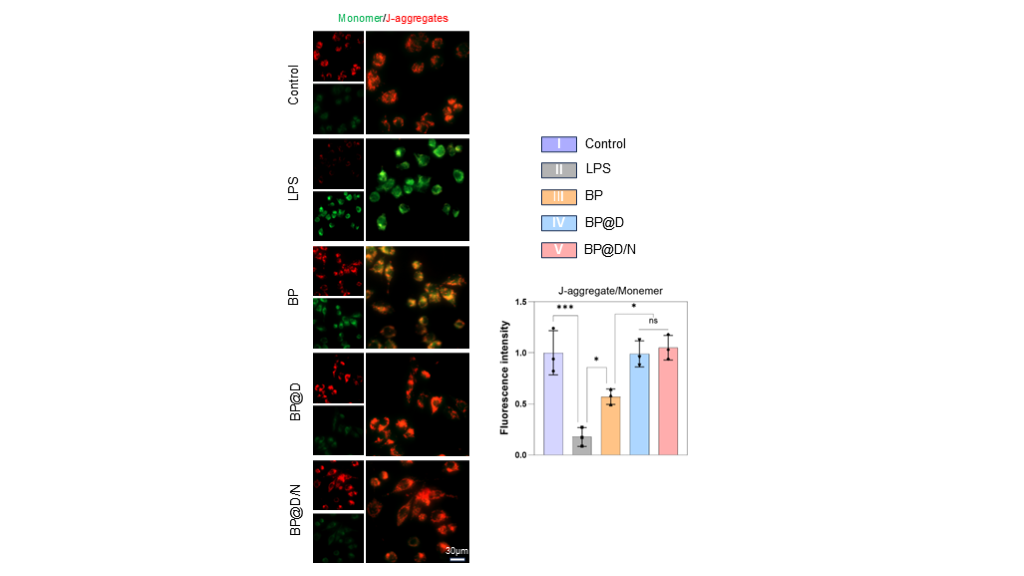


**Supplementary Figure 9. Detection of Mitochondrial membrane potential.** Immunofluorescence and semi-quantification of mitochondrial membrane potential in Mφ. (n=3, error bars, means±SD; analysis was done using one-way ANOVA with Tukey’s post-hoc test. *P < 0.05, **P < 0.01, and ***P < 0.001.)


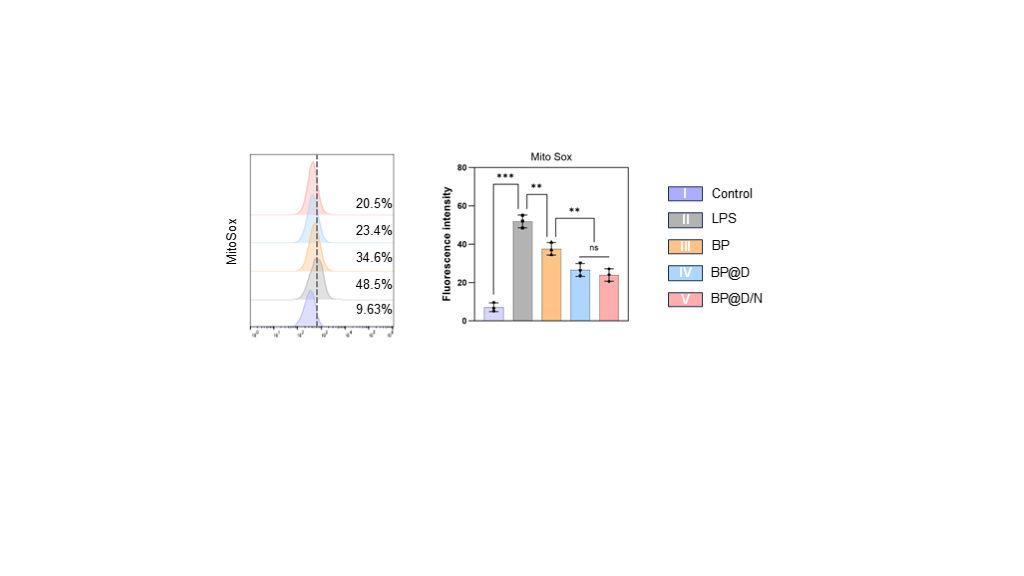


**Supplementary Figure 10. Detection of Mitosox.** Flow cytometry histograms and Quantitative analysis of MitoSox in Mφ. (n=3, error bars, means±SD; analysis was done using one-way ANOVA with Tukey’s post-hoc test. *P < 0.05, **P < 0.01, and ***P < 0.001.)


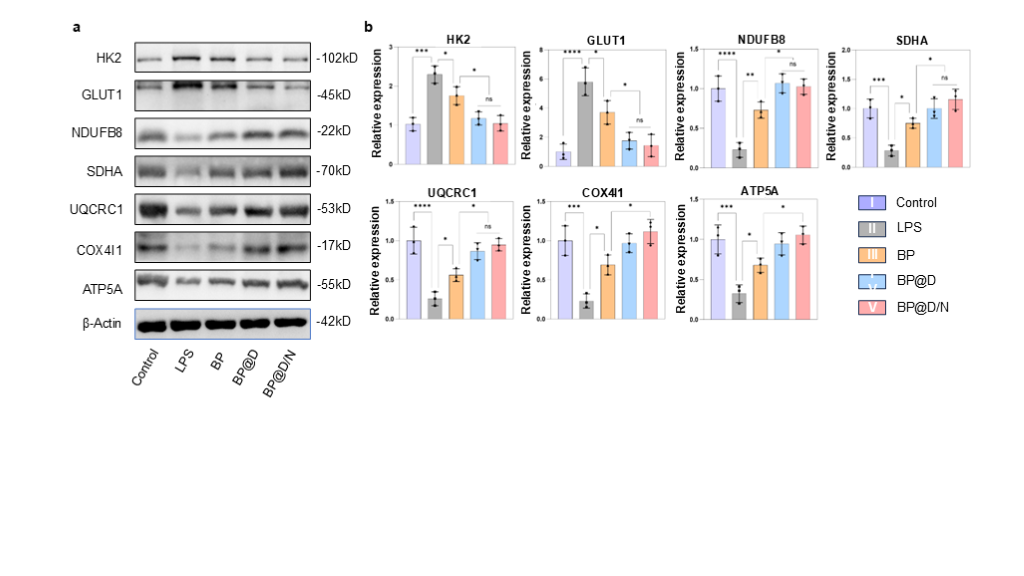


**Supplementary Figure 11. Detection of mitochondrial metabolic patterns. a** and **b** Western blot and semiquantitative analysis of the glycolysis and OXPHOS marker proteins in Mφ. (n=3, error bars, means±SD; analysis was done using one-way ANOVA with Tukey’s post-hoc test. *P < 0.05, **P < 0.01, and ***P < 0.001.)


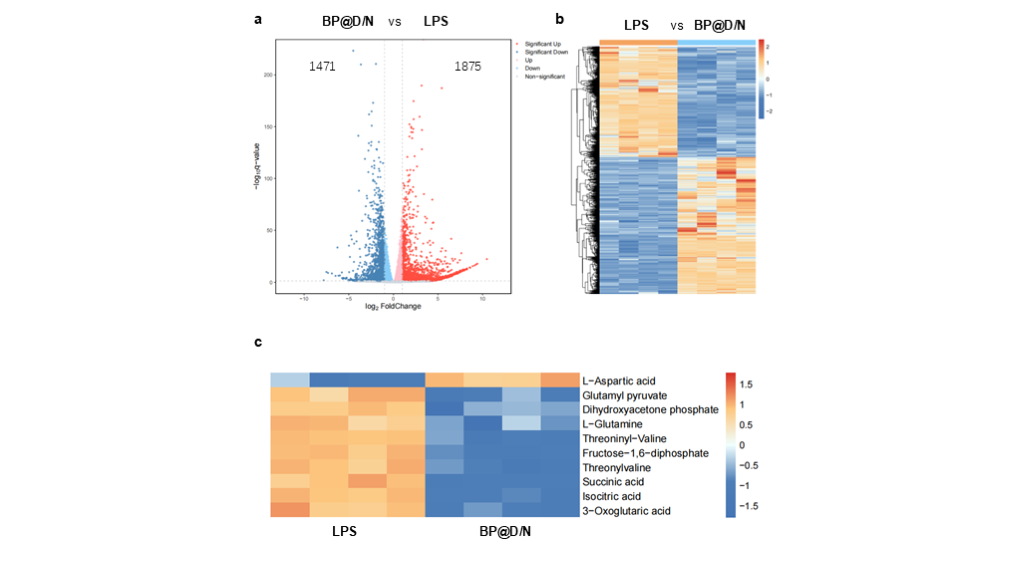


**Supplementary Figure 12. Transcriptional and metabolic sequencing of Mφ. a** Volcano map of differentially expressed genes (DEGs) (|log2foldchange|>1, padj<0.05). **b** Heatmap of DEGs. **c** Heat map of differential metabolites in macrophages. (n=4)


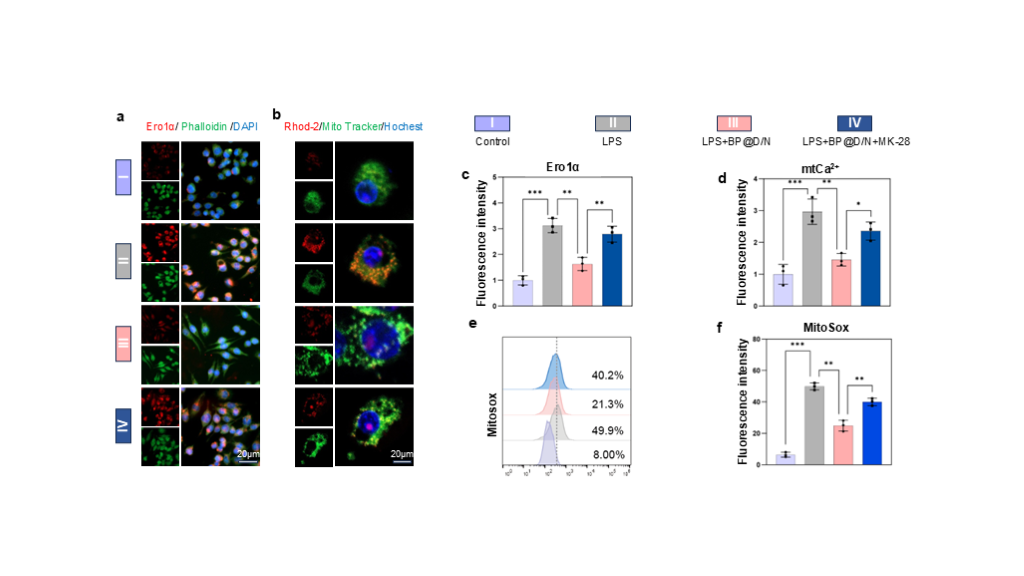


**Supplementary Figure 13. Detection of ERO1α, mtCa2+ and MitoSox in Mφ. a** Fluorescence images of Ero1α in Mφ. **b** Confocal images of Ca2+ in mitochondria in macrophages. **c** semiquantitative analysis of Ero1α in **a**. **d** semiquantitative analysis of Ca2+ in mitochondria in **b**. **e** and **f** Flow cytometry histograms and Quantitative analysis of MitoSox in macrophage. (n=3, error bars, means±SD; analysis was done using one-way ANOVA with Tukey’s post-hoc test. *P < 0.05, **P < 0.01, and ***P < 0.001.)

**
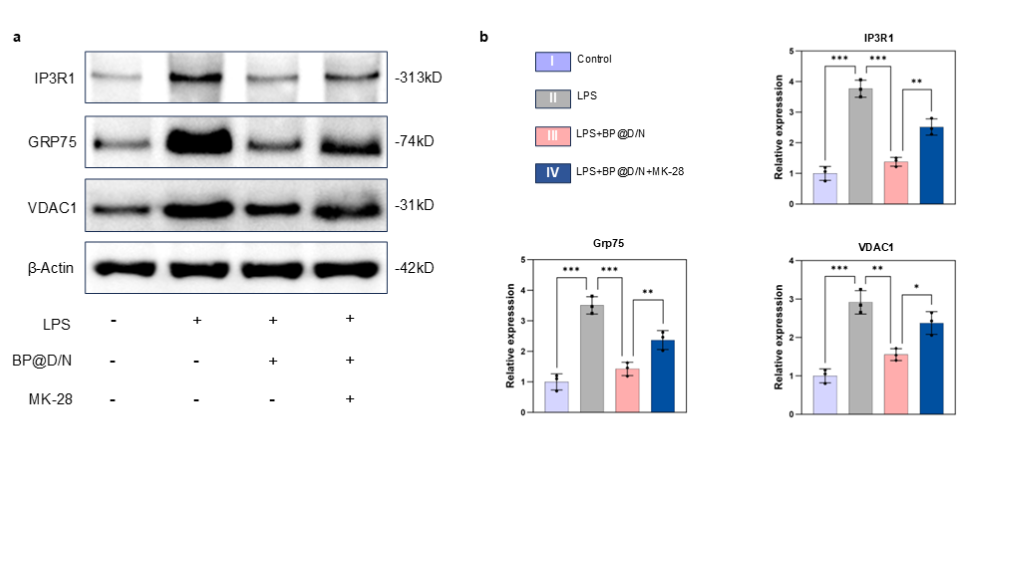
**

**Supplementary Figure 14.** **Detection of expression of MAMs in Mφ.** **a** and **b** Western blot and semiquantitative analysis of IP3R1, GRP75 and VDAC1 in Mφ. (n=3, error bars, means±SD; analysis was done using one-way ANOVA with Tukey’s post-hoc test. *P < 0.05, **P < 0.01, and ***P < 0.001.)


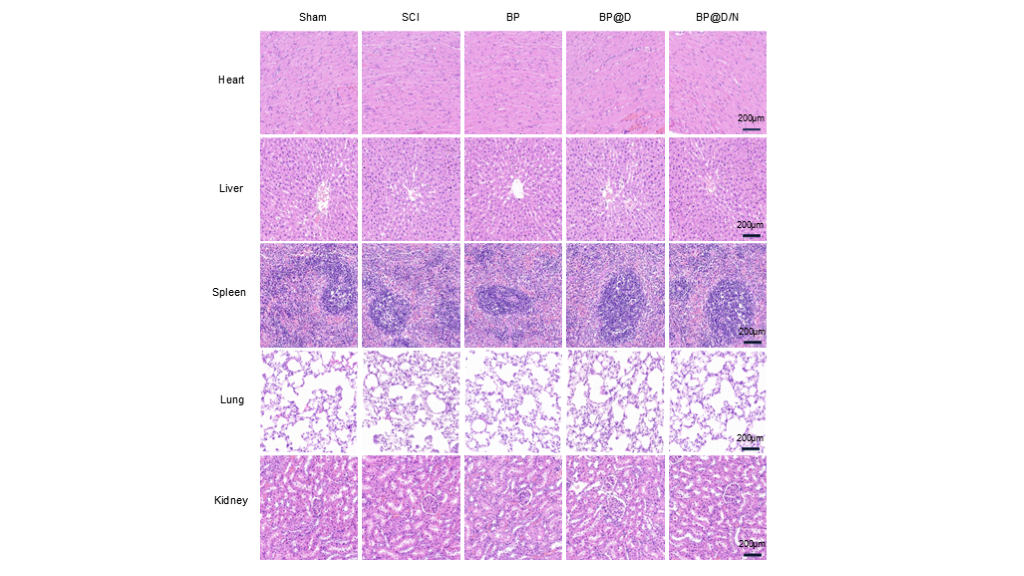


**Supplementary Figure 15. H&E staining of major organs(heart, liver, spleen, lung and kidney).**


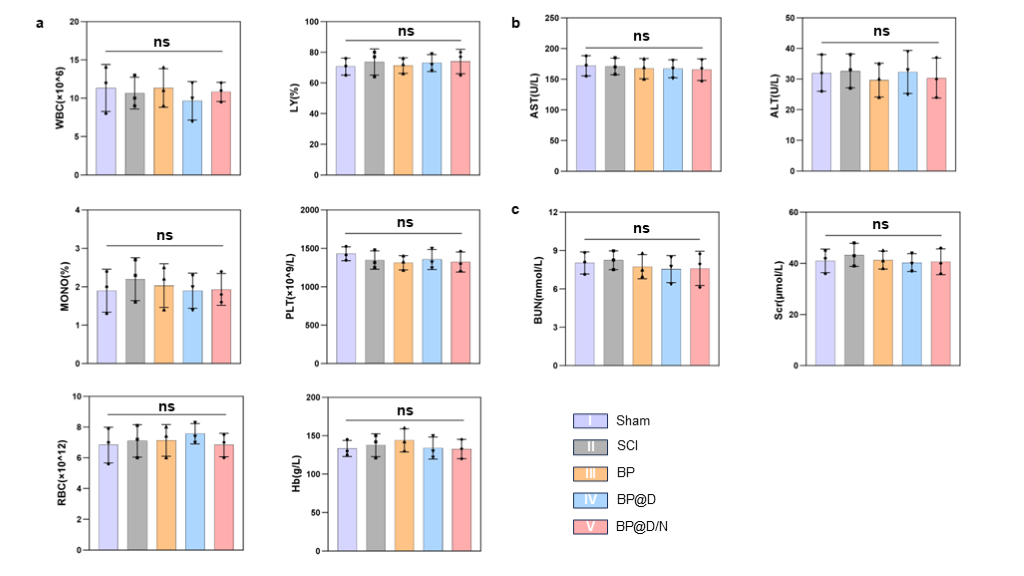


**Supplementary Figure 16. The biocompatibility of materials. a** Blood routine, **b** and **c** liver function and renal function indexes of SD rats in different groups. (n=3, error bars, means±SD; analysis was done using one-way ANOVA with Tukey’s post-hoc test. *P < 0.05, **P < 0.01, and ***P < 0.001.)


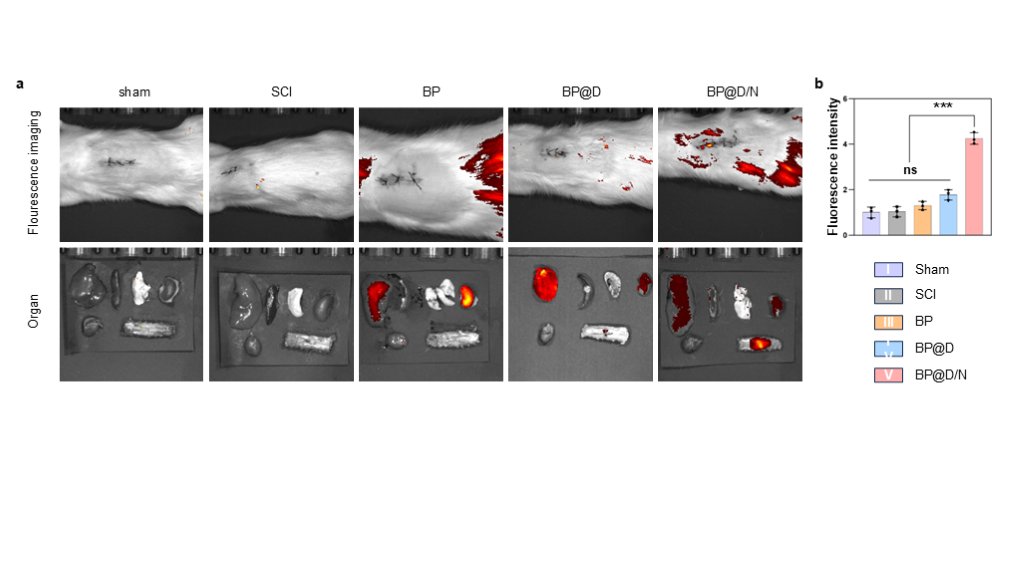


**Supplementary Figure 17.** **Detection of the targeting ability of materials in vivo.** **a** and **b** In vivo imaging was performed to detect the ability of Cy5-labeled BP, BP@D, BP@D/N to target damaged areas and semiquantitative result.(sham and SCI was injected with PBS.) (n=3, error bars, means±SD; analysis was done using one-way ANOVA with Tukey’s post-hoc test. *P < 0.05, **P < 0.01, and ***P < 0.001.)


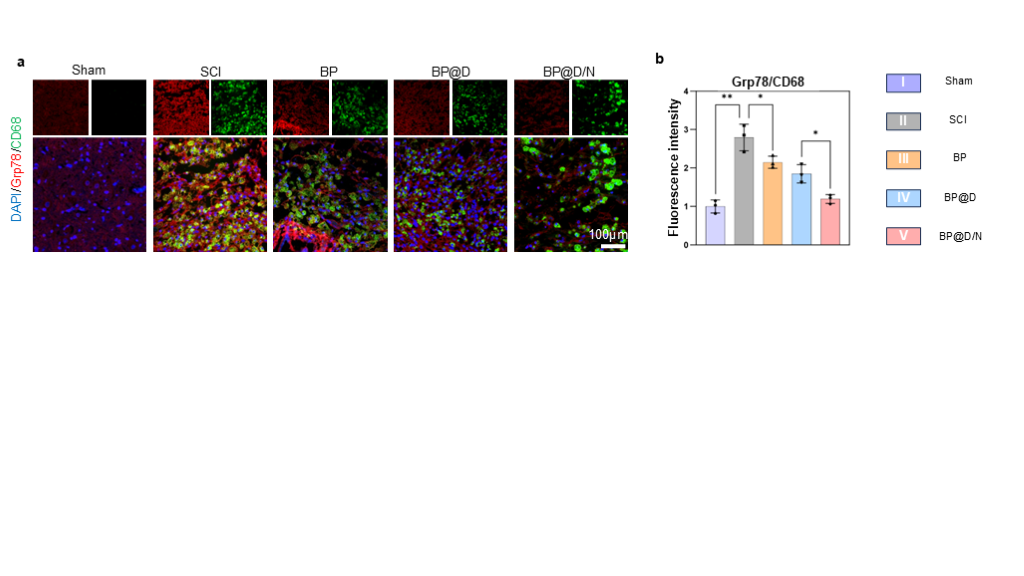


**Supplementary Figure 18. Detection of ERS in Mφ in vivo. a** and **b** Immunofluorescent images and semiquantitative analysis of the ratio of Grp78/CD68 around the lesion site. (n=3, error bars, means±SD; analysis was done using one-way ANOVA with Tukey’s post-hoc test. *P < 0.05, **P < 0.01, and ***P < 0.001.)

**Table S1**. **qRT-PCR immune factor primers**

| Gene | Primer | Sequence |
| --- | --- | --- |
| TNF-α | Forward | AGGCACTCCCCCAAAAGATG |
| Reverse | TGGTGGTTTGTGAGTGTGAGG |
| IL-1β | Forward | GAAATGCCACCTTTTGACAGTG |
| Reverse | TGGATGCTCTCATCAGGACAG |
| iNOS | Forward | GGGTCACAACTTTACAGGGAGT |
| Reverse | GAGTGAACAAGACCCAAGCG |
| IL-10 | Forward | GGTTGCCAAGCCTTGTCAGAA |
| Reverse | GCTCCACTGCCTTGCTTTTATT |
| CD206 | Forward | GCACTGGGTTGCATTGGTTT |
| Reverse | CCTGAGTGGCTTACGTGGTT |
| Arg-1 | Forward | CCAGAAGAATGGAAGAGTCAGTGT |
| Reverse | GCAGATATGCAGGGAGTCACC |
| β-Actin | Forward | GAGCTACGAGCTGCCTGACG |
| Reverse | CCTAGAAGCATTTGCGGTGG |
